# Supplementary material
Source: PubMed Central journal article supplement (PMC2770870)
Supplement: NIHMS79037-supplement-GKManuApendB.pdf [file NIHMS79037-supplement-GKManuApendB.pdf]

## Appendix B

**Table 1:** Nephropathy Status at enrollment according to study group.

| Characteristic                 |                    | Case        |                 |             | Control        |                 |             |
|--------------------------------|--------------------|-------------|-----------------|-------------|----------------|-----------------|-------------|
|                                |                    | Singleton   | Trio<br>Proband | Total       | Singleton      | Trio<br>Proband | Total       |
| <b>ESRD</b>                    |                    |             |                 |             |                |                 |             |
| N                              |                    | 369 (65%)   | 127 (51%)       | 496 (60%)   | 0              | 0               | 0           |
| Dialysis                       |                    | 40 (11%)    | 8 (6%)          | 48 (10%)    |                |                 |             |
| Kidney Transplant              |                    | 327 (89%)   | 119 (94%)       | 446 (90%)   |                |                 |             |
| Diabetes Duration at ESRD      |                    |             |                 |             |                |                 |             |
| (years)                        | <i>Mean (SD)</i>   | 24.6 (7.1)  | 24.5 (6.8)      | 24.5 (7.0)  |                |                 |             |
| ESRD Duration at Enrollment    |                    |             |                 |             |                |                 |             |
| (years)                        | <i>Mean (SD)</i>   | 9.1 (5.5)   | 7.6 (5.4)       | 8.7 (5.5)   |                |                 |             |
| <b>NON-ESRD</b>                |                    |             |                 |             |                |                 |             |
| N                              |                    | 203 (35%)   | 121 (49%)       | 324 (40%)   | 595<br>(100%)  | 302 (100%)      | 891 (100%)  |
| ACR (ug albumin/mg creatinine) |                    |             |                 |             |                |                 |             |
|                                | <i>Median (SD)</i> | 1045 (1577) | 1083 (1292)     | 1061 (1475) | 5.8 (3.5)      | 5.8 (3.6)       | 5.8 (3.6)   |
| MDRD GFR (mL/min/1.73m2)*      |                    |             |                 |             |                |                 |             |
|                                | <i>Mean (SD)</i>   | 53.7 (27)   | 49.6 (24.7)     | 52.3 (26.3) | 87.1<br>(16.8) | 87.9 (15.8)     | 87.4 (16.5) |
|                                | <i>GFR&lt;60</i>   | 122 (62%)   | 68 (62%)        | 190 (62%)   | 19 (3%)        | 3 (1%)          | 22 (3%)     |
|                                | <i>GFR≥60</i>      | 74 (38%)    | 41 (38%)        | 115 (38%)   | 562 (97%)      | 291 (99%)       | 853 (97%)   |
| Cockcroft-Gault GFR (mL/min)*  |                    |             |                 |             |                |                 |             |
|                                | <i>Mean (SD)</i>   | 72.1 (35.1) | 67.5 (36.7)     | 70.5 (35.7) | 108 (31)       | 114 (30)        | 110 (31)    |
|                                | <i>GFR&lt;60</i>   | 84 (44%)    | 54 (50%)        | 138 (46%)   | 7 (1%)         | 3 (1%)          | 10 (1%)     |
|                                | <i>GFR≥60</i>      | 109 (56%)   | 55 (50%)        | 164 (54%)   | 566 (99%)      | 283 (99%)       | 849 (99%)   |
| Serum Creatinine (mg/dL)       |                    |             |                 |             |                |                 |             |
|                                | <i>Mean (SD)</i>   | 1.8 (1.1)   | 1.8 (1.0)       | 1.8 (1.05)  | 0.9 (0.2)      | 0.9 (0.1)       | 0.9 (0.2)   |
| 100/creatinine                 | <i>&lt;60</i>      | 86 (44%)    | 48 (44%)        | 134 (44%)   | 0 (0%)         | 0 (0%)          | 0 (0%)      |
|                                | <i>≥60</i>         | 110 (56%)   | 61 (56%)        | 171 (56%)   | 579<br>(100%)  | 292 (100%)      | 871 (100%)  |
| Serum Cystatin C (mg/dL)       |                    |             |                 |             |                |                 |             |
|                                | <i>Mean (SD)</i>   | 1.8 (0.9)   | 1.8 (1.0)       | 1.8 (0.9)   | 0.9 (0.2)      | 0.9 (0.2)       | 0.9 (0.2)   |
| 100/cystatin C                 | <i>&lt;60</i>      | 83 (43%)    | 50 (47%)        | 133 (45%)   | 2 (0.4%)       | 0 (0%)          | 2 (0.2%)    |
|                                | <i>≥60</i>         | 109 (57%)   | 56 (53%)        | 165 (55%)   | 554<br>(99.6%) | 277 (100%)      | 831 (99.8%) |

\* References 41 and 42.

**Table 2:** Clinical characteristics at enrollment according to study group.

| Characteristic                            |                  | Case        |              |             | Control     |              |             | P value                        |
|-------------------------------------------|------------------|-------------|--------------|-------------|-------------|--------------|-------------|--------------------------------|
|                                           |                  | Singleton   | Trio Proband | Total       | Singleton   | Trio Proband | Total       | Total Cases vs. Total Controls |
| <b>Race</b>                               |                  |             |              |             |             |              |             |                                |
|                                           | <i>White</i>     | 505 (89%)   | 234 (94%)    | 739 (90%)   | 571 (97%)   | 292 (97%)    | 863 (97%)   | <0.0001                        |
| <b>Gender</b>                             |                  |             |              |             |             |              |             |                                |
|                                           | <i>Male</i>      | 305 (54%)   | 106 (43%)    | 411 (50%)   | 241 (41%)   | 127 (42%)    | 368 (41%)   | 0.0002                         |
| <b>Age at Entry (years)</b>               |                  |             |              |             |             |              |             |                                |
|                                           | <i>Mean (SD)</i> | 43.2 (6.8)  | 39.6 (7.2)   | 42.2 (7.1)  | 39.9 (8.4)  | 34.8 (8.2)   | 38.2 (8.7)  | <0.0001                        |
|                                           | <i>&lt;40</i>    | 174 (31%)   | 143 (58%)    | 317 (39%)   | 291 (49%)   | 218 (73%)    | 509 (57%)   | <0.0001                        |
|                                           | <i>40+</i>       | 396 (69%)   | 105 (42%)    | 501 (61%)   | 302 (51%)   | 82 (27%)     | 384 (43%)   |                                |
| <b>Body Mass Index (kg/m<sup>2</sup>)</b> |                  |             |              |             |             |              |             |                                |
|                                           | <i>Mean (SD)</i> | 25.9 (5.4)  | 25.5 (7.2)   | 25.8 (5.4)  | 26.1 (4.4)  | 26.5 (4.5)   | 26.2 (4.4)  | 0.0004                         |
| <b>Waist Circumference (cm)</b>           |                  |             |              |             |             |              |             |                                |
|                                           | <i>Mean (SD)</i> | 89.1 (15.8) | 89.1 (14.6)  | 89.1 (15.5) | 86.8 (13.9) | 84.3 (12.5)  | 85.9 (13.5) | 0.02                           |
| <b>Smoker</b>                             |                  |             |              |             |             |              |             |                                |
|                                           | <i>Ever</i>      | 281 (49%)   | 113 (46%)    | 394 (48%)   | 201 (34%)   | 96 (32%)     | 297 (33%)   | <0.0001                        |

**Table 3:** Diabetes characteristics at enrollment according to study group.

| Characteristic                      |                             | Case                       |              |            | Control    |              |            | P value                        |
|-------------------------------------|-----------------------------|----------------------------|--------------|------------|------------|--------------|------------|--------------------------------|
|                                     |                             | Singleton                  | Trio Proband | Total      | Singleton  | Trio Proband | Total      | Total Cases vs. Total Controls |
| <b>Age at Diagnosis of Diabetes</b> |                             |                            |              |            |            |              |            |                                |
|                                     | <i>Mean (SD)</i>            | 12.2 (6.9)                 | 10.5 (5.8)   | 11.7 (6.6) | 12.8 (7.3) | 13.6 (7.5)   | 11.2 (6.6) | 0.0046                         |
|                                     | <i>0-9</i>                  | 216 (38%)                  | 117 (47%)    | 333 (41%)  | 202 (34%)  | 130 (43%)    | 332 (37%)  | 0.003                          |
|                                     | <i>10-14</i>                | 173 (30%)                  | 77 (31%)     | 250 (31%)  | 136 (23%)  | 100 (33%)    | 236 (26%)  |                                |
|                                     | <i>15+</i>                  | 181 (32%)                  | 54 (22%)     | 235 (29%)  | 255(43%)   | 70 (23%)     | 325 (36%)  |                                |
| <b>Diabetes Duration</b>            |                             |                            |              |            |            |              |            |                                |
|                                     | <i>Mean (SD)</i>            | 31.0 (8.2)                 | 29.1 (7.3)   | 30.4 (8.0) | 26.3 (7.9) | 23.6 (7.1)   | 25.4 (7.7) | <0.0001                        |
|                                     | <i>10-14</i>                | 11 (2%)                    | 4 (2%)       | 15 (2%)    | NA         | NA           | NA         | <0.0001                        |
|                                     | <i>15-24</i>                | 125 (22%)                  | 61 (26%)     | 186 (23%)  | 287 (48%)  | 187 (62%)    | 474 (53%)  |                                |
|                                     | <i>25+</i>                  | 434 (76%)                  | 183 (74%)    | 617 (75%)  | 306 (52%)  | 113 (38%)    | 419 (47%)  |                                |
| <b>Pancreas transplant</b>          |                             |                            |              |            |            |              |            |                                |
|                                     | <i>Yes</i>                  | 156 (27%)                  | 52 (21%)     | 208 (25%)  | 0 (0.0%)   | 0 (0.0%)     | 0 (0.0%)   | <0.0001                        |
| <b>HbA1c (%)</b>                    |                             |                            |              |            |            |              |            |                                |
|                                     | <i>Mean (SD)</i>            | 7.7 (1.9)                  | 7.9 (2.0)    | 7.8 (1.9)  | 7.4 (1.1)  | 7.5 (1.3)    | 7.5(1.2)   |                                |
|                                     | without pancreas transplant | <i>Mean (SD)</i> 8.3 (1.5) | 8.4 (1.8)    | 8.4 (1.6)* | 7.4 (1.1)  | 7.5 (1.3)    | 7.5 (1.2)  | 0.0001                         |
|                                     | with pancreas transplant    | <i>Mean (SD)</i> 6.0 (1.7) | 6.0 (2.0)    | 6.0 (1.7)* |            |              |            |                                |
| <b>Insulin Regimen</b>              |                             |                            |              |            |            |              |            |                                |
|                                     | <i>Single shot</i>          | 43 (9%)                    | 15 (7%)      | 58 (8%)    | 31 (5%)    | 12 (4%)      | 43 (5%)    | <0.0001                        |
|                                     | <i>Multiple</i>             | 318 (67%)                  | 150 (68%)    | 468 (67%)  | 333 (57%)  | 145 (49%)    | 478 (54%)  |                                |
|                                     | <i>Pump</i>                 | 103 (22%)                  | 53 (24%)     | 156 (23%)  | 214 (36%)  | 139 (47%)    | 353 (40%)  |                                |
|                                     | <i>Other</i>                | 9 (2%)                     | 3 (1%)       | 12 (2%)    | 11 (2%)    | 2 (1%)       | 13 (1%)    |                                |
| Dose (Units/Kg/Day)                 |                             |                            |              |            |            |              |            |                                |
|                                     | <i>Mean (SD)</i>            | 0.5 (0.3)                  | 0.6 (0.3)    | 0.5 (0.4)  | 0.6 (0.2)  | 0.6 (0.2)    | 0.6 (0.2)  | 0.053                          |
| <b>Other Autoimmune diseases</b>    |                             |                            |              |            |            |              |            |                                |
|                                     | <i>Yes</i>                  | 110 (19%)                  | 34 (14%)     | 144 (18%)  | 126 (21%)  | 66 (22%)     | 192 (22%)  | 0.043                          |

\* p < 0.0001, for cases without pancreas transplants compared with those who had transplants

**Table 4:** Related Characteristics at enrollment according to study group.

| Characteristic                    |                  | Case        |              |             | Control     |              |             | P value                        |
|-----------------------------------|------------------|-------------|--------------|-------------|-------------|--------------|-------------|--------------------------------|
|                                   |                  | Singleton   | Trio Proband | Total       | Singleton   | Trio Proband | Total       | Total Cases vs. Total Controls |
| <b>Hypertension</b>               |                  |             |              |             |             |              |             |                                |
|                                   | <i>Yes</i>       | 482 (85%)   | 204 (82%)    | 686 (84%)   | 43 (7%)     | 11 (4%)      | 54 (6%)     | <0.0001                        |
| <b>Antihypertensive treatment</b> |                  |             |              |             |             |              |             |                                |
|                                   | <i>Yes</i>       | 468 (83%)   | 203 (83%)    | 671 (83%)   | NA          | NA           | NA          | <0.0001                        |
| <b>Blood Pressure</b>             |                  |             |              |             |             |              |             |                                |
| Systolic BP (mm Hg)               | <i>Mean (SD)</i> | 131.1 (20)  | 129.7 (18)   | 130.7 (19)  | 118.5 (12)  | 115.7 (11)   | 117.6(12)   | <0.0001                        |
| Diastolic BP (mm Hg)              | <i>Mean (SD)</i> | 74.1 (11.0) | 75.1 (10.6)  | 74.4 (10.9) | 71.4 (8.1)  | 71.3 (8.3)   | 71.4 (8.1)  | <0.0001                        |
| <b>Serum Lipids</b>               |                  |             |              |             |             |              |             |                                |
| Total Cholesterol (mg/dL)         | <i>Mean (SD)</i> | 188.3 (47)  | 199.6 (44)   | 191.6 (46)  | 185.1 (31)  | 186.5 (34)   | 185.5 (32)  | 0.029                          |
| HDL Cholesterol (mg/dL)           | <i>Mean (SD)</i> | 53.3 (18.0) | 56.2 (16.6)  | 54.1 (17.6) | 59.0 (15.9) | 56.6 (14.7)  | 58.2 (15.5) | <0.0001                        |
| Lipid-lowering drug               | <i>Yes</i>       | 302 (53%)   | 149 (60%)    | 451 (55%)   | 500 (85%)   | 251 (85%)    | 751 (85%)   | <0.0001                        |
| <b>Parents' Living</b>            |                  |             |              |             |             |              |             |                                |
|                                   | <i>0</i>         | 180 (32%)   | 0            | 180 (22%)   | 119 (20%)   | 0            | 119 (13%)   | <0.0001*                       |
|                                   | <i>1</i>         | 208 (37%)   | 0            | 208 (26%)   | 182 (31%)   | 0            | 182 (21%)   |                                |
|                                   | <i>2</i>         | 159 (28%)   | 247 (100%)   | 404 (50%)   | 258 (44%)   | 303 (100%)   | 559 (63%)   |                                |
|                                   | <i>Unkonwn</i>   | 14 (3%)     | 0            | 14 (2%)     | 26 (4%)     | 0            | 26 (3%)     |                                |

\* Note: The Chi-square test is done by comparing the numbers of parents' living of case and control singletons.

**Table 5:** Other Complications of Diabetes according to study group\*

| Complication                  |            | Case      |              |           | Control   |              |           | P value                        |
|-------------------------------|------------|-----------|--------------|-----------|-----------|--------------|-----------|--------------------------------|
|                               |            | Singleton | Trio Proband | Total     | Singleton | Trio Proband | Total     | Total Cases vs. Total Controls |
| <b>Retinopathy</b>            |            |           |              |           |           |              |           |                                |
| Laser Treatment               | <i>Yes</i> | 476 (86%) | 201 (83%)    | 677 (85%) | 109 (19%) | 40 (13%)     | 149 (17%) | <0.0001                        |
| <b>Cardiovascular Disease</b> |            |           |              |           |           |              |           |                                |
|                               | <i>Yes</i> | 504 (89%) | 206 (83%)    | 710 (87%) | 67 (11%)  | 27 (9%)      | 94 (11%)  | <0.0001                        |
| <b>Neuropathy</b>             |            |           |              |           |           |              |           |                                |
|                               | <i>Yes</i> | 383 (67%) | 156 (63%)    | 539 (66%) | 81 (14%)  | 23 (8%)      | 104 (12%) | <0.0001                        |

\*The complications are self-reported.
